# Supplementary material
Source: PubMed Central journal article supplement (PMC2795045)
Supplement: NIHMS149539-supplement-supplement_1.pdf [file NIHMS149539-supplement-supplement_1.pdf]

## Appendix

***X. laevis* genes induced by 100 nM TCDD exposure for 3 hours.**

| Shared Comparison | Description                                                                        | Probe Set          | Fold Change |
|-------------------|------------------------------------------------------------------------------------|--------------------|-------------|
| 1                 | TCDD - DMSCDNA clone IMAGE:6940776                                                 | XI.1220.1.S1_at    | 6.6992519   |
| 1                 | TCDD - DMSCTranscribed locus                                                       | XI.11097.1.S1_at   | 2.145033234 |
| 0                 | TCDD - DMSCTranscribed locus, moderately similar to XP_001060648.1 PREDICTED: sin  | XI.9596.1.A1_at    | 2.071965527 |
| 0                 | TCDD - DMSCTranscribed locus, moderately similar to XP_001060648.1 PREDICTED: sin  | XI.23611.1.A1_x_at | 1.765405993 |
| 1                 | TCDD - DMSCCytochrome P450, complete cds, clone MC1                                | XI.1692.1.S1_at    | 1.719115727 |
| 0                 | TCDD - DMSCLapl04 mRNA, complete sequence                                          | XI.21677.2.A1_at   | 1.628638787 |
| 1                 | TCDD - DMSCTranscribed locus                                                       | XI.7045.1.S1_x_at  | 1.439266083 |
| 1                 | TCDD - DMSCC3H-2: CCCH zinc finger protein C3H-2                                   | XI.475.1.S1_s_at   | 1.426684833 |
| 1                 | TCDD - DMSCMGC81225: hypothetical protein MGC81225                                 | XI.16594.2.A1_at   | 1.34567809  |
| 1                 | TCDD - DMSChyal2: hyaluronidase 2                                                  | XI.6247.1.S1_at    | 1.286394669 |
| 0                 | TCDD - DMSCMGC83793: hypothetical protein MGC83793                                 | XI.6972.1.A1_at    | 1.258175639 |
| 1                 | TCDD - DMSCbvm-a: basic, immunoglobulin-like variable motif-containing protein     | XI.4066.1.S1_at    | 1.252953899 |
| 1                 | TCDD - DMSCaldoc: aldolase C, fructose-bisphosphate                                | XI.8701.1.S1_a_at  | 1.250062303 |
| 1                 | TCDD - DMSCMGC79057: hypothetical protein MGC79057                                 | XI.18385.1.A1_at   | 1.248330549 |
| 1                 | TCDD - DMSCMGC80329: MGC80329 protein                                              | XI.25548.1.A1_at   | 1.239134966 |
| 1                 | TCDD - DMSCMGC53121: hypothetical protein MGC53121                                 | XI.8379.1.S1_at    | 1.234562607 |
| 1                 | TCDD - DMSCMGC53732: similar to CDC42 effector protein (Rho GTPase binding) 2      | XI.7782.1.S1_at    | 1.211952649 |
| 1                 | TCDD - DMSCLOC496352: hypothetical LOC496352                                       | XI.5956.1.S1_at    | 1.193887309 |
| 1                 | TCDD - DMSCMGC80877: MGC80877 protein                                              | XI.4306.1.S1_at    | 1.189481912 |
| 1                 | TCDD - DMSCLIC1: chloride intracellular channel protein 1                          | XI.24738.1.S1_at   | 1.178539408 |
| 0                 | TCDD - DMSCMGC115420: hypothetical protein MGC115420                               | XI.19589.1.S1_at   | 1.158828175 |
| 0                 | TCDD - DMSCMGC79074: MGC79074 protein                                              | XI.11557.1.A1_at   | 1.155886707 |
| 1                 | TCDD - DMSCTranscribed locus, moderately similar to XP_577689.2 PREDICTED: similar | XI.7441.1.A1_at    | 1.148167666 |
| 0                 | TCDD - DMSCTranscribed locus                                                       | XI.21838.1.A1_at   | 1.143138335 |
| 1                 | TCDD - DMSCLOC495354: hypothetical LOC495354                                       | XI.15811.1.A1_at   | 1.134979836 |
| 1                 | TCDD - DMSMyd88-A: Toll/IL-1 receptor binding protein MyD88                        | XI.700.1.S1_at     | 1.124538717 |
| 0                 | TCDD - DMSCMGC64296: hypothetical protein MGC64296                                 | XI.4168.1.S1_at    | 1.123240349 |
| 0                 | TCDD - DMSCTranscribed locus, moderately similar to XP_001074512.1 PREDICTED: sin  | XI.5950.1.A1_at    | 1.119354233 |
| 1                 | TCDD - DMSccalm2a: calmodulin 2-like                                               | XI.24457.1.S1_at   | 1.117803554 |
| 0                 | TCDD - DMSCMGC68674: Hypothetical protein MGC68674                                 | XI.24384.2.S1_at   | 1.114708637 |
| 1                 | TCDD - DMSCMGC64430: Hypothetical protein MGC64430                                 | XI.24392.1.S1_at   | 1.071773463 |

***X. laevis* genes repressed by 100 nM TCDD exposure for 3 hours.**

| Shared Comparison | Description                                                                        | Probe Set        | Fold Change |
|-------------------|------------------------------------------------------------------------------------|------------------|-------------|
| 0                 | TCDD - DMSCMGC68535: hypothetical protein MGC68535                                 | XI.4788.2.A1_at  | 1.985726138 |
| 0                 | TCDD - DMSCLOC398071: mis5p                                                        | XI.3661.1.S1_at  | 1.925633751 |
| 0                 | TCDD - DMSCriok2: RIO kinase 2 (yeast)                                             | XI.1664.3.A1_at  | 1.436608211 |
| 1                 | TCDD - DMSCTranscribed locus, weakly similar to XP_001067472.1 PREDICTED: similar  | XI.24254.1.A1_at | 1.250351162 |
| 0                 | TCDD - DMSCMGC81672: MGC81672 protein                                              | XI.21239.1.A1_at | 1.248619008 |
| 0                 | TCDD - DMSCTranscribed locus, moderately similar to XP_226175.4 PREDICTED: similar | XI.16510.2.A1_at | 1.236846673 |
| 1                 | TCDD - DMSCTranscribed locus                                                       | XI.22799.1.A1_at | 1.184271612 |
| 0                 | TCDD - DMSCTranscribed locus                                                       | XI.4196.1.A1_at  | 1.17609125  |
| 0                 | TCDD - DMSCMGC81404: Hypothetical protein MGC81404                                 | XI.12195.1.A1_at | 1.155886707 |
| 1                 | TCDD - DMSCTranscribed locus, weakly similar to XP_308048.2 ENSANGP00000019431     | XI.4149.1.A1_at  | 1.149229289 |
| 1                 | TCDD - DMSCMGC82864: MGC82864 protein                                              | XI.6759.1.A1_at  | 1.14843298  |
| 1                 | TCDD - DMSCTranscribed locus                                                       | XI.25388.1.A1_at | 1.087488391 |

Appendix

**X. laevis genes induced by 100 nM FICZ exposure for 3 hours.**

| Shared Comparison | Description                                                                               | Probe Set          | Fold Change |
|-------------------|-------------------------------------------------------------------------------------------|--------------------|-------------|
| 1 FICZ - DMSO     | CDNA clone IMAGE:6940776                                                                  | XI.1220.1.S1_at    | 16.83042847 |
| 0 FICZ - DMSO     | SYNE1: similar to spectrin repeat containing, nuclear envelope 1                          | XI.14119.1.S1_at   | 6.711646198 |
| 1 FICZ - DMSO     | Transcribed locus                                                                         | XI.11097.1.S1_at   | 6.184541602 |
| 0 FICZ - DMSO     | Transcribed locus, weakly similar to XP_420865.1 PREDICTED: similar to GXI.7783.1.A1_at   | XI.14954.1.A1_at   | 5.886186824 |
| 0 FICZ - DMSO     | MGC52735: similar to gap junction protein, alpha 7, 45kDa (connexin 45)                   | XI.3337.1.S2_at    | 5.152716911 |
| 0 FICZ - DMSO     | Transcribed locus, weakly similar to XP_234399.4 PREDICTED: similar to A XI.18681.1.A1_at | XI.18681.1.A1_at   | 4.17564771  |
| 0 FICZ - DMSO     | Transcribed locus                                                                         | XI.14954.1.A1_at   | 3.148504363 |
| 0 FICZ - DMSO     | Transcribed locus, weakly similar to NP_001013229.1 proline rich protein 2                | XI.13754.2.A1_at   | 3.144142633 |
| 0 FICZ - DMSO     | Transcribed locus                                                                         | XI.14584.1.A1_at   | 2.890528573 |
| 0 FICZ - DMSO     | Transcribed locus                                                                         | XI.23236.1.A1_at   | 2.821247692 |
| 0 FICZ - DMSO     | Transcribed locus                                                                         | XI.12789.1.A1_at   | 2.622604028 |
| 0 FICZ - DMSO     | Transcribed locus                                                                         | XI.25124.1.A1_at   | 2.585900325 |
| 0 FICZ - DMSO     | PECAM: platelet endothelial cell adhesion molecule                                        | XI.2357.1.A1_at    | 2.546766455 |
| 0 FICZ - DMSO     | Transcribed locus                                                                         | XI.25275.1.A1_at   | 2.386120112 |
| 1 FICZ - DMSO     | Transcribed locus                                                                         | XI.7045.1.S1_x_at  | 2.380613368 |
| 0 FICZ - DMSO     | Transcribed locus                                                                         | XI.7045.1.S1_a_at  | 2.340256506 |
| 0 FICZ - DMSO     | Transcribed locus                                                                         | XI.15009.1.A1_at   | 2.31551537  |
| 0 FICZ - DMSO     | tef: thyrotrophic embryonic factor                                                        | XI.16518.1.S1_at   | 2.216576775 |
| 0 FICZ - DMSO     | pmp22: peripheral myelin protein 22                                                       | XI.11939.1.A1_at   | 2.17900071  |
| 0 FICZ - DMSO     | MGC85390: MGC85390 protein                                                                | XI.23887.1.A1_at   | 2.123827608 |
| 0 FICZ - DMSO     | Transcribed locus, weakly similar to XP_553282.1 ENSANGP00000025654                       | XI.25142.1.A1_at   | 2.101860129 |
| 0 FICZ - DMSO     | Transcribed locus                                                                         | XI.14954.2.S1_at   | 2.064320057 |
| 1 FICZ - DMSO     | Cytochrome P450, complete cds, clone MC1                                                  | XI.1692.1.S1_at    | 2.062889675 |
| 0 FICZ - DMSO     | KCNE5.1: voltage-gated potassium channel subunit MiRP4.1                                  | XI.16370.1.S1_at   | 2.049587147 |
| 0 FICZ - DMSO     | thbs3: thrombospondin 3                                                                   | XI.198.1.S1_at     | 1.939027593 |
| 0 FICZ - DMSO     | snag1: sorting nexin associated golgi protein 1                                           | XI.8253.1.A1_at    | 1.854032671 |
| 0 FICZ - DMSO     | tef: Thyrotrophic embryonic factor                                                        | XI.26148.1.S1_x_at | 1.852319972 |
| 0 FICZ - DMSO     | Transcribed locus, moderately similar to XP_217645.4 PREDICTED: similar                   | XI.16033.1.A1_at   | 1.820918897 |
| 0 FICZ - DMSO     | Transcribed locus                                                                         | XI.22841.1.A1_at   | 1.798341071 |
| 0 FICZ - DMSO     | MGC81838: MGC81838 protein                                                                | XI.23853.1.A1_at   | 1.794190818 |
| 0 FICZ - DMSO     | MGC81086: MGC81086 protein                                                                | XI.22475.1.S1_at   | 1.776043191 |
| 0 FICZ - DMSO     | Transcribed locus, weakly similar to XP_515968.1 PREDICTED: similar to K XI.14090.1.A1_at | XI.14090.1.A1_at   | 1.766630103 |
| 0 FICZ - DMSO     | Transcribed locus                                                                         | XI.6569.1.A1_at    | 1.747549515 |
| 0 FICZ - DMSO     | MGC69051: twisted gastrulation                                                            | XI.502.1.S1_at     | 1.736280455 |
| 0 FICZ - DMSO     | Transcribed locus                                                                         | XI.18344.1.A1_at   | 1.725084064 |
| 0 FICZ - DMSO     | LOC398022: Insulin-like growth factor-1 receptor beta subunit                             | XI.269.1.S2_x_at   | 1.678299274 |
| 0 FICZ - DMSO     | LOC495374: hypothetical LOC495374                                                         | XI.11117.1.S1_at   | 1.66285995  |
| 0 FICZ - DMSO     | Transcribed locus                                                                         | XI.10124.1.A1_at   | 1.637694964 |
| 0 FICZ - DMSO     | Transcribed locus                                                                         | XI.14834.1.A1_at   | 1.634293011 |
| 0 FICZ - DMSO     | MGC69132: hypothetical protein MGC69132                                                   | XI.18713.1.S1_at   | 1.632406092 |
| 0 FICZ - DMSO     | CDNA clone MGC:86486 IMAGE:5512398                                                        | XI.1404.1.A1_at    | 1.630521352 |
| 0 FICZ - DMSO     | xGR: glucocorticoid receptor protein                                                      | XI.1201.1.S1_at    | 1.602139755 |
| 0 FICZ - DMSO     | Xemdr: multidrug resistance protein                                                       | XI.966.1.S1_at     | 1.579352639 |
| 0 FICZ - DMSO     | MGC52909: hypothetical protein MGC52909                                                   | XI.12976.1.S1_at   | 1.565185156 |
| 0 FICZ - DMSO     | ethe1: ETHE1 protein                                                                      | XI.17492.1.S1_a_at | 1.558689251 |
| 0 FICZ - DMSO     | MGC83924: Hypothetical protein MGC83924                                                   | XI.11501.1.S1_at   | 1.522385086 |
| 0 FICZ - DMSO     | Transcribed locus, weakly similar to XP_515866.1 PREDICTED: similar to K XI.18112.1.A1_at | XI.18112.1.A1_at   | 1.518520796 |
| 0 FICZ - DMSO     | trep-a: tadpole repetitive sequence (XLTREP)                                              | XI.23593.1.S1_at   | 1.517819253 |
| 1 FICZ - DMSO     | C3H-2: CCCH zinc finger protein C3H-2                                                     | XI.475.1.S1_s_at   | 1.513616793 |
| 1 FICZ - DMSO     | hyal2: hyaluronidase 2                                                                    | XI.6247.1.S1_at    | 1.51221856  |
| 1 FICZ - DMSO     | MGC53121: hypothetical protein MGC53121                                                   | XI.8379.1.S1_at    | 1.503508822 |
| 0 FICZ - DMSO     | Transcribed locus                                                                         | XI.21191.1.S1_at   | 1.498999602 |
| 0 FICZ - DMSO     | Transcribed locus, moderately similar to XP_508050.1 PREDICTED: similar                   | XI.3142.1.A1_at    | 1.493813457 |
| 0 FICZ - DMSO     | NIF: NIF protein                                                                          | XI.18931.1.A1_at   | 1.483837734 |
| 0 FICZ - DMSO     | Transcribed locus                                                                         | XI.22482.1.A1_at   | 1.479387509 |
| 0 FICZ - DMSO     | Syndecan-4.1                                                                              | XI.5405.1.A1_at    | 1.478362431 |
| 1 FICZ - DMSO     | MGC79057: hypothetical protein MGC79057                                                   | XI.18385.1.A1_at   | 1.477679441 |
| 0 FICZ - DMSO     | rxra-A: retinoid X receptor, alpha                                                        | XI.877.1.S1_at     | 1.475973344 |
| 0 FICZ - DMSO     | LOC397854: annexin VII                                                                    | XI.1075.1.S1_at    | 1.446266414 |
| 0 FICZ - DMSO     | Transcribed locus, weakly similar to XP_422828.1 PREDICTED: similar to T XI.2017.1.A1_at  | XI.2017.1.A1_at    | 1.444596587 |
| 0 FICZ - DMSO     | rac-2: rac-2 protein                                                                      | XI.4621.1.A1_at    | 1.443262113 |
| 0 FICZ - DMSO     | Ubl3: similar to ubiquitin-like 3                                                         | XI.21417.1.S1_at   | 1.420435511 |
| 0 FICZ - DMSO     | Transcribed locus, moderately similar to XP_001055156.1 PREDICTED: sin                    | XI.23713.1.A1_at   | 1.392168014 |

Appendix

**X. laevis genes induced by 100 nM FICZ exposure for 3 hours (continued).**

| Shared Comparison | Description                                                                   | Probe Set          | Fold Change |
|-------------------|-------------------------------------------------------------------------------|--------------------|-------------|
| 0 FICZ - DMSO     | lsm: secreted protein lsthmin                                                 | Xl.4323.1.A2_at    | 1.386390173 |
| 0 FICZ - DMSO     | LOC398469: hypothetical protein LOC398469                                     | Xl.11441.1.S1_at   | 1.384149716 |
| 0 FICZ - DMSO     | Transcribed locus, moderately similar to NP_990431.1 cartilage associated     | Xl.24676.2.S1_at   | 1.383510251 |
| 0 FICZ - DMSO     | MGC84351: MGC84351 protein                                                    | Xl.16584.1.S1_at   | 1.380636311 |
| 0 FICZ - DMSO     | MGC85492: MGC85492 protein                                                    | Xl.14987.1.A1_at   | 1.377450046 |
| 1 FICZ - DMSO     | bivm-a: basic, immunoglobulin-like variable motif-containing protein          | Xl.4066.1.S1_at    | 1.355351138 |
| 1 FICZ - DMSO     | CLIC1: chloride intracellular channel protein 1                               | Xl.24738.1.S1_at   | 1.344434994 |
| 1 FICZ - DMSO     | MGC53732: similar to CDC42 effector protein (Rho GTPase binding) 2            | Xl.7782.1.S1_at    | 1.342813877 |
| 0 FICZ - DMSO     | TLF: TBP-like factor                                                          | Xl.228.1.S1_at     | 1.327458415 |
| 0 FICZ - DMSO     | ethe1: ETHE1 protein                                                          | Xl.17492.2.S1_x_at | 1.32592576  |
| 0 FICZ - DMSO     | Transcribed locus                                                             | Xl.4946.1.A1_at    | 1.294743815 |
| 1 FICZ - DMSO     | MGC81225: hypothetical protein MGC81225                                       | Xl.16594.2.A1_at   | 1.29056249  |
| 0 FICZ - DMSO     | LOC397899: xlgv7 gene product                                                 | Xl.1204.1.S1_at    | 1.285503317 |
| 0 FICZ - DMSO     | MGC53595: hypothetical protein MGC53595                                       | Xl.8245.1.S1_at    | 1.284019103 |
| 0 FICZ - DMSO     | MGC81823: MGC81823 protein                                                    | Xl.2565.5.A1_s_at  | 1.281351835 |
| 0 FICZ - DMSO     | smc3: structural maintenance of chromosomes protein 3                         | Xl.290.1.S1_x_at   | 1.275149735 |
| 1 FICZ - DMSO     | aldoc: aldolase C, fructose-bisphosphate                                      | Xl.8701.1.S1_a_at  | 1.258757174 |
| 0 FICZ - DMSO     | Transcribed locus                                                             | Xl.19601.1.A1_at   | 1.244874235 |
| 0 FICZ - DMSO     | LOC495092: Hypothetical LOC495092                                             | Xl.9454.2.A1_at    | 1.242862474 |
| 1 FICZ - DMSO     | LOC496352: hypothetical protein LOC496352                                     | Xl.5956.1.S1_at    | 1.2397077   |
| 0 FICZ - DMSO     | LOC414512: hypothetical protein LOC414512                                     | Xl.9998.2.S1_a_at  | 1.237132479 |
| 0 FICZ - DMSO     | Transcribed locus, weakly similar to NP_598237.1 UDP-Gal:betaGlcNAc bet       | Xl.17229.1.A1_at   | 1.236846673 |
| 1 FICZ - DMSO     | MGC80329: MGC80329 protein                                                    | Xl.25548.1.A1_at   | 1.23000712  |
| 0 FICZ - DMSO     | MGC86453: MGC86453 protein                                                    | Xl.25611.1.A1_at   | 1.229154839 |
| 0 FICZ - DMSO     | MGC52875: hypothetical protein MGC52875                                       | Xl.4789.1.S1_at    | 1.227735684 |
| 0 FICZ - DMSO     | Rap1a: RAP1A, member of RAS oncogene family                                   | Xl.23802.1.S1_at   | 1.226601539 |
| 0 FICZ - DMSO     | Transcribed locus, moderately similar to NP_067734.1 ataxin 3 [Rattus norv    | Xl.3069.1.A1_at    | 1.223488041 |
| 0 FICZ - DMSO     | Transcribed locus, weakly similar to XP_522068.1 PREDICTED: similar to p      | Xl.5014.2.S1_a_at  | 1.223205388 |
| 0 FICZ - DMSO     | LOC733155: NHE3 kinase A regulatory protein 1                                 | Xl.24021.1.S1_at   | 1.223205388 |
| 0 FICZ - DMSO     | Transcribed locus                                                             | Xl.25926.1.A1_s_at | 1.222075428 |
| 0 FICZ - DMSO     | MGC114747: hypothetical protein MGC114747                                     | Xl.7237.1.S1_at    | 1.220664447 |
| 1 FICZ - DMSO     | LOC495354: hypothetical LOC495354                                             | Xl.15811.1.A1_at   | 1.218128784 |
| 0 FICZ - DMSO     | MGC81854: MGC81854 protein                                                    | Xl.25757.1.S1_at   | 1.211392737 |
| 1 FICZ - DMSO     | MGC80877: MGC80877 protein                                                    | Xl.4306.1.S1_at    | 1.200803427 |
| 0 FICZ - DMSO     | MGC83976: MGC83976 protein                                                    | Xl.5817.1.A1_at    | 1.189481912 |
| 0 FICZ - DMSO     | LOC414512: hypothetical protein LOC414512                                     | Xl.9998.2.S1_at    | 1.159899655 |
| 1 FICZ - DMSO     | myd88-A: Toll/IL-1 receptor binding protein MyD88                             | Xl.700.1.S1_at     | 1.147637223 |
| 1 FICZ - DMSO     | Transcribed locus, moderately similar to XP_577689.2 PREDICTED: similar       | Xl.7441.1.A1_at    | 1.143138335 |
| 0 FICZ - DMSO     | MGC82372: hypothetical protein MGC82372                                       | Xl.2601.1.S1_at    | 1.139446615 |
| 0 FICZ - DMSO     | Transcribed locus                                                             | Xl.24978.1.A1_at   | 1.138131035 |
| 0 FICZ - DMSO     | Transcribed locus, moderately similar to XP_308258.2 ENSANGP00000010          | Xl.10906.1.S1_at   | 1.1341934   |
| 0 FICZ - DMSO     | LOC494665: hypothetical LOC494665                                             | Xl.8480.1.S1_at    | 1.130530567 |
| 0 FICZ - DMSO     | Transcribed locus, moderately similar to NP_733752.1 transcription factor-III | Xl.15007.1.A1_at   | 1.129225281 |
| 0 FICZ - DMSO     | Transcribed locus, weakly similar to XP_426331.1 PREDICTED: similar to s      | Xl.16474.1.A1_at   | 1.124538717 |
| 1 FICZ - DMSO     | calm2a: calmodulin 2-like                                                     | Xl.24457.1.S1_at   | 1.108800644 |
| 0 FICZ - DMSO     | MGC80349: MGC80349 protein                                                    | Xl.8349.1.S1_at    | 1.106753038 |
| 0 FICZ - DMSO     | dynll2: dynein light chain 2                                                  | Xl.8719.1.S1_at    | 1.104709213 |
| 1 FICZ - DMSO     | MGC64430: Hypothetical protein MGC64430                                       | Xl.24392.1.S1_at   | 1.101650551 |
| 0 FICZ - DMSO     | MGC80657: MGC80657 protein                                                    | Xl.15266.1.S1_at   | 1.091263877 |
| 0 FICZ - DMSO     | snrpf: small nuclear ribonucleoprotein polypeptide F                          | Xl.19215.1.S1_at   | 1.085981856 |

Appendix

**X. laevis genes repressed by 100 nM FICZ exposure for 3 hours.**

| Shared Comparison | Description                                                                              | Probe Set          | Fold Change |
|-------------------|------------------------------------------------------------------------------------------|--------------------|-------------|
| 0 FICZ - DMSO     | Transcribed locus                                                                        | Xl.11300.1.A1_at   | 2.558562248 |
| 0 FICZ - DMSO     | ZPD: zona pellucida glycoprotein homolog                                                 | Xl.1019.1.S1_at    | 1.951612551 |
| 0 FICZ - DMSO     | Transcribed locus, weakly similar to NP_985559.1 AFR012Cp [Eremotheciu                   | Xl.19017.1.A1_at   | 1.658639092 |
| 0 FICZ - DMSO     | cdc6B: Cdc6-related protein                                                              | Xl.23442.1.A1_at   | 1.656341323 |
| 0 FICZ - DMSO     | MGC52899: similar to oncoprotein induced transcript 1                                    | Xl.25191.1.S1_at   | 1.574252182 |
| 0 FICZ - DMSO     | Transcribed locus, weakly similar to XP_540453.2 PREDICTED: similar to GXI.15681.1.A1_at | Xl.15681.1.A1_at   | 1.505246747 |
| 0 FICZ - DMSO     | Transcribed locus, moderately similar to XP_343580.3 PREDICTED: similar                  | Xl.15448.2.A1_at   | 1.501079098 |
| 0 FICZ - DMSO     | Transcribed locus                                                                        | Xl.16008.1.A1_at   | 1.500038989 |
| 0 FICZ - DMSO     | MGC80820: MGC80820 protein                                                               | Xl.24399.1.A1_at   | 1.439931319 |
| 0 FICZ - DMSO     | Transcribed locus, moderately similar to XP_237523.4 PREDICTED: similar                  | Xl.12595.1.A1_at   | 1.416502682 |
| 0 FICZ - DMSO     | Transcribed locus, weakly similar to NP_114451.1 kalirin, RhoGEF kinase [F               | Xl.8437.1.A1_at    | 1.408344227 |
| 0 FICZ - DMSO     | Transcribed locus, weakly similar to NP_114451.1 kalirin, RhoGEF kinase [F               | Xl.18712.1.A1_s_at | 1.394421449 |
| 0 FICZ - DMSO     | sox-k1-a: sox-K1 ptotein                                                                 | Xl.21610.1.S1_at   | 1.34754489  |
| 0 FICZ - DMSO     | Transcribed locus                                                                        | Xl.20619.1.S1_at   | 1.337618464 |
| 1 FICZ - DMSO     | Transcribed locus, weakly similar to XP_001067472.1 PREDICTED: similar                   | Xl.24254.1.A1_at   | 1.333914934 |
| 0 FICZ - DMSO     | Transcribed locus                                                                        | Xl.14748.2.A1_at   | 1.327765158 |
| 0 FICZ - DMSO     | Transcribed locus, weakly similar to NP_572800.2 Rab40 CG1900-PA, isofc                  | Xl.18601.1.A1_at   | 1.31494276  |
| 0 FICZ - DMSO     | p2ry4: purinergic receptor P2Y, G-protein coupled 4                                      | Xl.1269.1.S1_at    | 1.304050735 |
| 0 FICZ - DMSO     | Transcribed locus                                                                        | Xl.7760.1.A1_at    | 1.29743896  |
| 0 FICZ - DMSO     | Transcribed locus                                                                        | Xl.18504.1.S1_at   | 1.292950162 |
| 0 FICZ - DMSO     | Metap1: similar to methionyl aminopeptidase 1                                            | Xl.22063.1.S1_at   | 1.2875841   |
| 0 FICZ - DMSO     | Transcribed locus                                                                        | Xl.12556.1.A1_at   | 1.254402205 |
| 0 FICZ - DMSO     | LOC495355: hypothetical LOC495355                                                        | Xl.23684.1.A1_at   | 1.25411241  |
| 0 FICZ - DMSO     | CDNA clone IMAGE:5074572                                                                 | Xl.21410.2.S1_at   | 1.241427492 |
| 0 FICZ - DMSO     | LOC495142: hypothetical LOC495142                                                        | Xl.8959.1.A1_at    | 1.228303149 |
| 1 FICZ - DMSO     | Transcribed locus, weakly similar to XP_308048.2 ENSANGP00000019431                      | Xl.4149.1.A1_at    | 1.225468443 |
| 0 FICZ - DMSO     | Ppan: similar to peter pan homolog (Drosophila)                                          | Xl.7873.1.S1_x_at  | 1.218973419 |
| 1 FICZ - DMSO     | Transcribed locus                                                                        | Xl.25388.1.A1_at   | 1.203303026 |
| 0 FICZ - DMSO     | Transcribed locus                                                                        | Xl.10424.1.A1_at   | 1.193060056 |
| 1 FICZ - DMSO     | MGC82864: MGC82864 protein                                                               | Xl.6759.1.A1_at    | 1.185366617 |
| 1 FICZ - DMSO     | Transcribed locus                                                                        | Xl.22799.1.A1_at   | 1.179629113 |
| 0 FICZ - DMSO     | Transcribed locus                                                                        | Xl.13469.1.A1_at   | 1.162045587 |
| 0 FICZ - DMSO     | camk2g: calcium/calmodulin-dependent protein kinase (CaM kinase) II gamr                 | Xl.693.10.S1_x_at  | 1.132622164 |
| 0 FICZ - DMSO     | VH4: Ig rearranged H chain V-region subgroup 4                                           | Xl.23507.1.A1_at   | 1.129486218 |
| 0 FICZ - DMSO     | crk2: SH2/SH3 adaptor Crk2                                                               | Xl.100.1.S1_at     | 1.07997656  |
